# Supplementary material for: The impact of positive and negative psychological affect and overconfidence from major family events on new venture survival
Source: Springer Nature journal article supplement (doi:10.1007/s11365-024-00970-w), 2024-04-15
Supplement: MOESM1 [file 26983226]

Pi-Shen Seet

Professor of Entrepreneurship and Innovation

School of Business and Law, Edith Cowan University (ECU)

270 Joondalup Drive, Joondalup WA 6027, Australia

p.seet@ecu.edu.au

14 March 2024

Daniel Palacios-Marqués, Polytechnic University of Valencia, Spain

Virginia Simón-Moya, University of Valencia, Spain

Editors-in-Chief

International Entrepreneurship and Management Journal (IEMJ)

**Re-Submission to IEMJ (Submission: IEMJ-D-23-00242R1)**

Dear Professors Palacios-Marqués and Simón-Moya

1. On behalf of my co-author, Dr Wee Liang Tan, I would like to thank you for giving us the opportunity and the extension requested to revise our manuscript, entitled *“The Impact of Positive and Negative Psychological Affect and Overconfidence from Major Family Events on New Venture Survival”*, for re-submission to IEMJ.
2. As you have suggested, we have undertaken the revisions on the paper. We would like to thank the editor and reviewer for providing us with especially helpful and high-quality comments and suggestions to improve the manuscript quality during the process. Please find the manuscript for re-submission attached.
3. Please also find attached a revisions table, where we have tried to carefully review and address the issues you raised and the reviewer’s comments and paying particular attention to the points mentioned in the decision letter. The revisions table also provides point-by-point responses explaining how we have attempted to do so.
4. We believe the result is a greatly improved manuscript with a clear contribution that better meets IEMJ’s high standards.
5. Please contact me if you require any further information.
6. Thank you and best regards.

Yours sincerely,

<Sent via e-mail>

Pi-Shen Seet
